# Supplementary material for: Targeting UBR5 inhibits postsurgical breast cancer lung metastases by inducing apoptosis mediated by CDC73 and p53
Source: Research Square preprint supplement (doi:10.21203/rs.3.rs-2288884/v1), 2022-11-28
Supplement: Supplementary file 1 [file 2d7432f431b534986b77f68b.docx]

**Supplemental Table S1:** RT-PCR primer list

| Gene name | Species | Forward Sequence | Reverse Sequence |
| --- | --- | --- | --- |
| Gapdh | Mouse | ACAACTTTGGCATTGTGGAA | GATGCAGGGATGATGTTCTG |
| Ubr5 | Mouse | CAATCACGCCGCGTTTCTT | GTCCTTCCTGGCCTAGAGGT |
| Cdc73 | Mouse | GGGGAAGCATCAACATCAGCA | GCTCTTTTGACTTGAGTAGACCG |
| Parp-1 | Mouse | ACACCACAAAACCTCAGCCA | ACAAACCACAAACAACCGGC |
| Pdgfrb | Mouse | TGTGCAGTTGCCTTACGACT | CGCTACTTCTGGCTGTCGAT |
| Lama3 | Mouse | GGCTACAGCAAGTCAGTCCA | CCGATCACCACACTGTCGAT |
| Areg | Mouse | GCCATCATCCTCGCAGCTAT | ATGTCATTTCCGGTGTGGCT |
| Itga2 | Mouse | TTAGATTCCCCAGCGCAGAC | TCACTTGAAGGCCCGGAAAA |
| Mylk | Mouse | CTGGGTTTCCAAGAGAGCCTTTA | CCTTCTTTGACGCAGAGGTTC |
| Ecm1 | Mouse | GAACAAAGAGAAGTGCAGCCCC | GGCAGGCGGGTCTATTTCCT |
| Vimentin | Mouse | TCCACACGCACCTACAGTCT | CCGAGGACCGGGTCACATA |
| GAPDH | Human | GAAGGTGAAGGTCGGAGTCA | TGGAATCATATTGGAACATGT |
| UBR5 | Human | CACCTTAGGAAGCCGCTGGA | CGATCCCGTCCTCTCCGAAT |


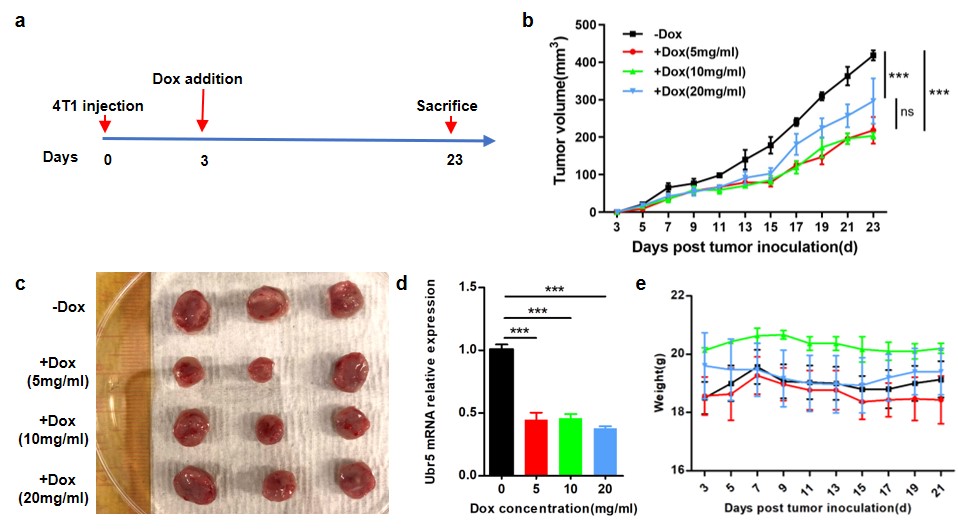


**Supplementary Fig. S1:** The effect of different concentration of doxycycline in downregulating the expression of the protein of Ubr5 in vivo. **a.** Schematic for knocking down Ubr5 expression with doxycycline. The BALB/c mice that injected with 5×105 4T1/Tet-shUbr5 cells into mammary pad were treated with 200ul different concentration of doxycycline(5mg/ml, 10mg/ml, 20mg/ml) daily by gavage from D3 and sacrificed on D23 for analyze. **b.** Tumor growth curve of four groups. Tumor size was measured every 2 days. **c.** Tumors from orthotopic model were resected on D23. **d.** The Ubr5 mRNA expression in 4T1 tumors bearing mice treated with different concentration of doxycycline was detected by real-time quantitative PCR and expressed as relative expression to that of GAPDH. **e.** The weight curve after doxycycline addition. Data represent mean ± SEM; *P <0.05; **P <0.01; ***P < 0.001.


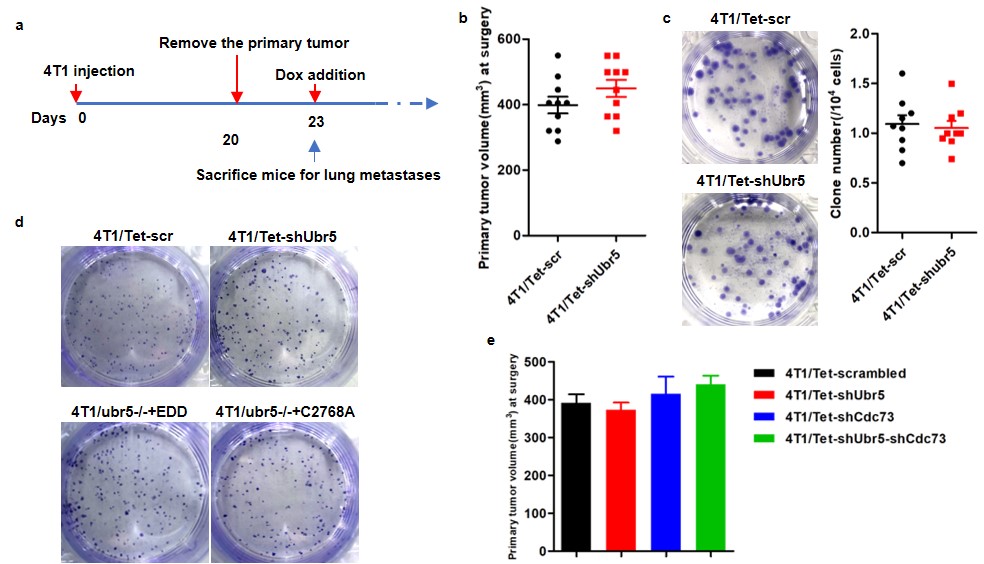


**Supplementary Figure S2:** The tumor volume and lung metastases before primary tumor removal surgery. **a.** Schematic for removing primary tumor and sacrificing mice for spontaneous metastases analyze. 5×105 4T1/Tet-scrambled, 4T1/Tet-shUbr5, 4T1/Ubr5-/-+EDD, 4T1/Ubr5-/-+EDD-C2768A, 4T1/Tet-shCdc73, 4T1/Tet-shUbr5-shCdc73 cells were s.c. injected into the mammary pad of BALB/c mice. The mice were sacrificed for 6-thioguanine clonogenicity assay on D23. **b.** Primary tumor volume were measured on the day of primary tumor removal surgery. **c.** The micro-metastases in the lung of mice bearing 4T1/Tet-scrambled and 4T1/Tet-shUbr5 cells before Dox addition were visualized and quantitated by the 6-thioguanine clonogenicity assay. **d.** The micro-metastases in the lung of mice were quantitated by the 6-thioguanine clonogenicity assay. **e.** The primary tumor volume was measured on D20 after tumor cells inoculation.


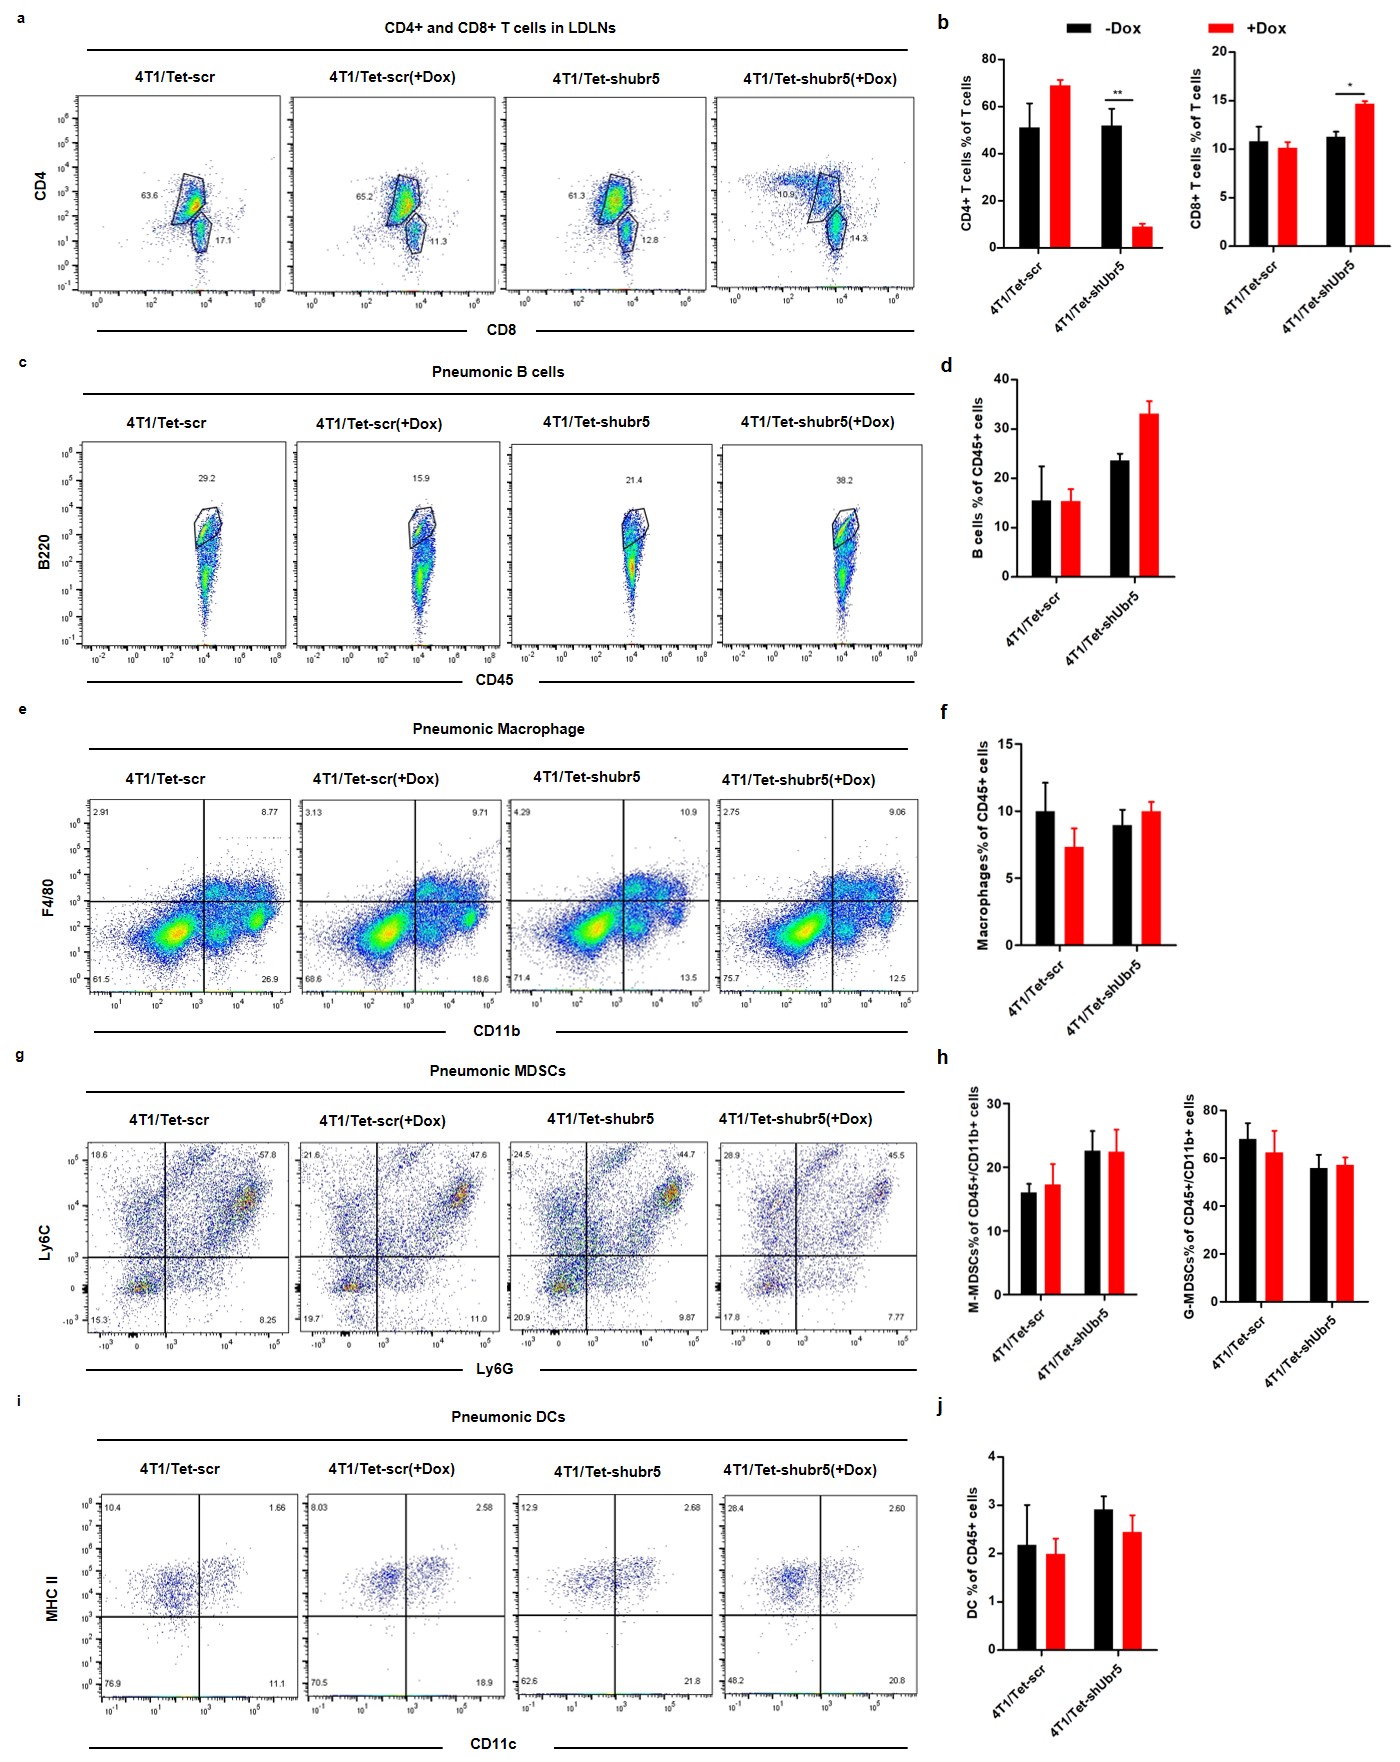


**Supplementary Figure S3:** Immunological alterations in mice with inducible knock-down Ubr5 expression by Tet-on system. 4T1 tumor cells were s.c. injected into the mammary pad of BALB/c mice and on day 35, mice were sacrificed and organs were harvest for FACS analysis after tumor removal on day 20. **a, b.** Representative FACS images(**a**) and quantification(**b**) of CD4 T cells and CD8 T cells in lung draining lymph nodes(LDLN). Representative FACS images of pneumonic B cells(**c**), macrophage(**e**), MDSCs(**g**) and DCs(**i**). Quantification of pneumonic B cells(**d**), macrophage(**f**), MDSCs(**h**) and DCs(**j**). In all cases, data are representative of at least three independent experiments using three to four mice per group. Data represent mean ± SEM; * P < 0.05; **P <0.01.


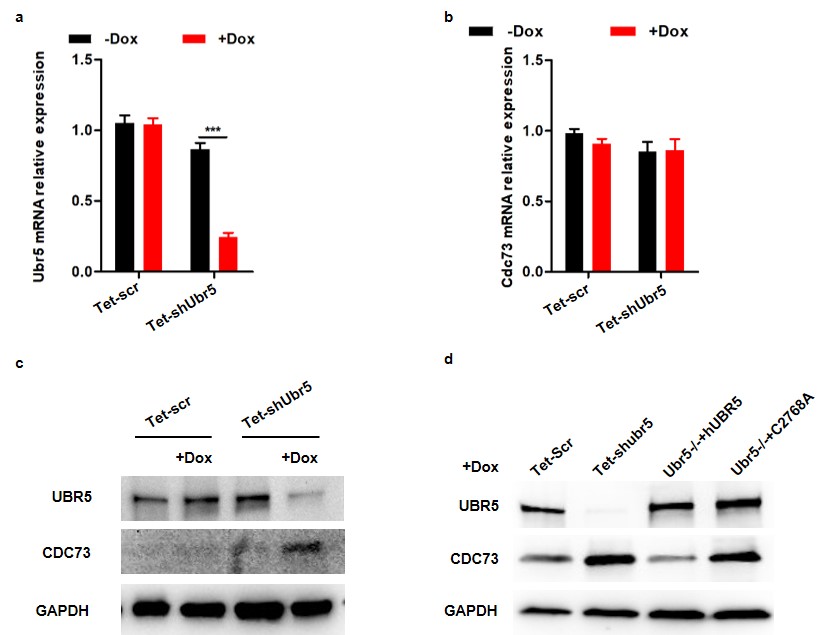


**Supplementary Figure S4:** The UBR5 and CDC73 mRNA and protein expression in 4T1 cells. **a, b.** Ubr5 mRNA(a) and cdc73 mRNA(b) expression of 4T1/Tet-scrambled(±Dox) and 4T1/Tet-shUbr5 (±Dox) cells was detected by real-time quantitative PCR. **c.** Protein expression of UBR5 and CDC73 in 4T1/Tet-scrambled(±Dox) and 4T1/Tet-shUbr5 (±Dox) cells analyzed by Western blot. **d.** Protein expression of UBR5 and CDC73 in 4T1/Tet-scrambled(+Dox), 4T1/Tet-shUbr5 (+Dox), 4T1/ubr5-/-+EDD (+Dox), 4T1/ubr5-/-+C2768A (+Dox). Data represent mean ± SEM; *P <0.05; **P <0.01; ***P < 0.001.
